# Supplementary material
Source: PubMed Central journal article supplement (PMC5817947)

## Loss of host-derived osteopontin creates a glioblastoma-promoting microenvironment

Frank Szulzewsky, Nina Schwendinger, Dilansu Güneykaya, Patrick J Cimino, Dolores Hambardzumyan, Michael Synowitz, Eric C Holland, Helmut Kettenmann

### Supplementary data

Suppl. Table S1: List of antibodies used for flow cytometry

Suppl. Table S2: List of primers used for qRT-PCRs

Suppl. Table S3: List of antibodies used for immunofluorescence staining

Suppl. Figure S1: TCGA gene expression data shows that *OPN/SPP1* expression in human GBM whole tumor samples strongly correlates with the expression of myeloid cell markers *CD68*, *PTPRC/CD45*, *ITGAM/CD11b*, and *HAVCR2*, but not with general tumor cell markers *GFAP*, *OLIG2*, *SOX2*, *EGFR*, *CDKN2A*, *CDK4*, *TP53*, *GLI1*. Pearson correlation was used to calculate correlation coefficients.

Suppl. Figure S2: A and B: Isoform specific primers were used to determine the expression of the different *OPN/SPP1* transcript variants in human non-tumor brain  $CD11b^+$  samples,  $CD11b^+$ , and  $CD11b^-$  GBM cell fractions.  $\Delta$ ct values relative to *ACTB* expression (A) and fold changes relative to non-tumor brain  $CD11b^+$  samples (B) are shown. Error bars represent SD. C and D: One-Way ANOVA multiple comparison statistics are shown for Graph A (C) and Graph B (D). E and F: The expression of *AIF1/Iba1* (E) and *GFAP* (F) was measured in  $CD11b^+$  (n = 8) and  $CD11b^-$  (n = 4) fractions to assess purity of the samples. Error bars represent SEM.

Suppl. Figure S3: Representative images from sections of three human GBM samples stained for Iba1 and OPN. Left panel: 10x objective, bar represents 100  $\mu$ m Right panel: 40x objective, bar represents 50  $\mu$ m

Suppl. Figure S4: Images taken from human GBM sections stained for OPN and Iba1 showing Osteopontin staining that does not co-localize with Iba1 staining. 10x objective, bar represents 100  $\mu$ m

Suppl. Figure S5: A: Graph showing the percent of  $OPN^+$  cells in  $CD11b^+$  and  $CD11b^-$  fractions from mouse naïve brains (n=2) and GL261 tumors (n=4). B: One-Way ANOVA multiple comparison statistics are shown for Graph A C: Plots depicting the strategy for isolation of microglia and macrophages/monocytes from naïve brains, naïve spleens, and GL261 glioma-bearing brains using *Cx3cr1<sup>GFP/wt</sup> Ccr2<sup>RFP/wt</sup>* mice. D: Percentages of  $GFP^+/RFP^-$  microglia and  $GFP^{low}/RFP^+$  macrophages/monocytes in cell isolates from GL261 tumor core and border regions. Statistics were calculated using One-Way-ANOVA. E: Isoform specific primers were used to determine the expression of the different *OPN/SPP1* transcript variants in the  $GFP^+/RFP^-$ ,  $GFP^{low}/RFP^+$ , and  $GFP^-/RFP^-$  cell fractions of GL261 tumors that were implanted into *Cx3cr1<sup>GFP/wt</sup> Ccr2<sup>RFP/wt</sup>* mice. F: One-Way ANOVA multiple comparison statistics are shown for Graph E

Suppl. Figure S6: A: Western Blot of three neonatal microglia lysates and three GL261 cell lysates stained for mouse OPN and beta-Actin. B and C: OPN staining in Iba1<sup>+</sup> cells co-localizes with the Golgi marker GRASP65 in human GBM samples (B) and mouse GL261 tumors (C). D and E: Original z stack images that were used for the 3D reconstructions in Figure 2 D and E. F and G: 3D reconstructions and original z stack images of co-stainings of human (F) and mouse (G) tumors for Iba1, OPN, and LAMP1. Bars represents 25  $\mu$ m (B and C) and 3  $\mu$ m (D-G).

Suppl. Figure S7: Graph showing the average weight progression of GL261 implanted OPN<sup>-/-</sup> and wild type mice (n = 10 for each group). P value was calculated by linear regression. Error bars represent SD.

Suppl. Figure S8: Representative images of GL261 tumors in wild type and OPN<sup>-/-</sup> mice. A: Sections stained with CD31 and GFAP. GFAP staining is restricted to the tumor border areas but absent in tumor core. Upper panels: 10x objective. Middle and lower panels: 20x objective. Bars represent 100  $\mu$ m. B: Sections stained with CD31 and AQP4. AQP4 staining is restricted to the tumor border areas but absent in tumor core. Upper panels: 10x objective. Middle and lower panels: 20x objective. Bars represent 100  $\mu$ m.

Suppl. Figure S9: Layout showing the gating strategy used to analyse the immune cell compartment in naïve brains and tumor-bearing OPN<sup>-/-</sup> and wild type mice

Suppl. Table S1

|       |                     |                   |
|-------|---------------------|-------------------|
| CD45  | eFlour450           | eBioscience       |
| CD11b | Alexa700            | eBioscience       |
| CD3   | APC                 | eBioscience       |
| CD4   | FITC                | eBioscience       |
| CD8   | PE                  | eBioscience       |
| CD196 | brillant violet 421 | Biolegend         |
| OPN   | PE                  | RD Systems IC808P |

Supplementary Table S2

|                     |                           |
|---------------------|---------------------------|
| human SPP1 Fwd      | GCCGAGGTGATAGTGTGGTT      |
| human SPP1 Rev      | AACGGGGATGGCCTTGTATG      |
| human Actb Fwd      | GAGCTACGAGCTGCCTGAC       |
| human Actb Rev      | GACTCCATGCCAGGAAGG        |
| mouse Actb Fwd      | CGTGGGCCGCCCTAGGCACCA     |
| mouse Actb Rev      | CTTAGGGTTCAGGGGGGC        |
| mouse Arg1 Fwd      | GGCAGAGGTCCAGAAGAATGG     |
| mouse Arg1 Rev      | AGCATCCACCCAAATGACACA     |
| mouse Cd86 Fwd      | ACAACCAGACTCCTGTAGACG     |
| mouse Cd86 Rev      | TGTAATGGGCACGGCAGAT       |
| mouse Cd163 Fwd     | ACTCTAAAACCTGGGGCAACAAA   |
| mouse Cd163 Rev     | TGGGATTTCCTCCAACCA        |
| mouse Cd206 Fwd     | GACTGTGTAGTTGTGATTGGTGG   |
| mouse Cd206 Rev     | AAGCCATCTTTGGAGTAGTGGT    |
| mouse Ifng Fwd      | TTACTACCTTCTCAGCAACAGCAA  |
| mouse Ifng Rev      | GCGACTCCTTTCCGCTTCC       |
| mouse Il1b Fwd      | TGGTGTGTGACGTTCCATT       |
| mouse Il1b Rev      | TGTCCATTGAGGTGGAGAGC      |
| mouse Il1r2 Fwd     | AGGCAAGAAGCAGCAAGGTA      |
| mouse Il1r2 Rev     | CTGTTGGAGTGGTGAAAGCAG     |
| mouse Il1rn Fwd     | CAGAAAGGGCGGGAGATTTT      |
| mouse Il1rn Rev     | GGTTCATGGTGGAACAACACT     |
| mouse Il6 Fwd       | ACAAAGAAATGATGGATGCTACCAA |
| mouse Il6 Rev       | GTACTIONCAGAAGACCAGAGGAAA |
| mouse Il10 Fwd      | CCAAGCCTTATCGGAAATGAT     |
| mouse Il10 Rev      | ATCCTGAGGGTCTTCAGCTTC     |
| mouse Il27 Fwd      | CTGTTGCTGCTACCCTTGCTT     |
| mouse Il27 Rev      | CACTCCTGGCAATCGAGATTC     |
| mouse Irf7 Fwd      | GCCCAAGGAGAAGACCCTGA      |
| mouse Irf7 Rev      | AGACAAGCACAAAGCCGAGAC     |
| mouse Mmp9 Fwd      | CATTGCGGTGGATAAGGAGT      |
| mouse Mmp9 Rev      | ACCTGGTTCACCTCATGGTC      |
| mouse Mmp14 Fwd     | GTGCCCTATGCCTACATCCG      |
| mouse Mmp14 Rev     | CAGCCACCAAGAAGATGTCA      |
| mouse Nos2 Fwd      | GGACGAGACGGATAGGCAGA      |
| mouse Nos2 Rev      | CGTGGGGTTGTTGCTGAACT      |
| mouse Ptgs2 Fwd     | AGCACTTCACCCATCAGTTTTT    |
| mouse Ptgs2 Rev     | ATACACCTCTCCACCAATGACC    |
| mouse Spp1 Fwd      | AGCAAGAAACTCTTCCAAGCAA    |
| mouse Spp1 Rev      | GTGAGATTGCTCAGATTCATCCG   |
| mouse Stat3 Fwd     | CAGTTCTCGTCCACCACCAAG     |
| mouse Stat3 Rev     | GACACCTGAGTAGTTCACACC     |
| mouse TNFa Fwd      | AGGAGGAGTCTGCGAAGAAGA     |
| mouse TNFa Rev      | GGCAGTGGACCATCTAACTCG     |
| mouse Vegfa Fwd     | GCACATAGGAGAGATGAGCTT     |
| mouse Vegfa Rev     | TCTGGCTTTGTTCTGTCTTTCT    |
| human SPP1tv1-2 Fwd | CCTCCTAGGCATCACCTGTGCCAT  |
| human SPP1tv1 Rev   | CATTGGTTTCTTCAGAGGACACAG  |

|                     |                           |
|---------------------|---------------------------|
| human SPP1tv2 Rev   | TTGGAAGGGTCTGTGGGGCTAGG   |
| human SPP1tv3-5 Fwd | GAATTGCAGTGATTTGCTTTTGC   |
| human SPP1tv3 Rev   | AGGACACAGCATTCTGCTTTTC    |
| human SPP1tv4 Rev   | GGAAGGGTCTGCTTTTCCTCA     |
| human SPP1tv5 Rev   | AGGTACATCTTTAGTGCTGCTTTTC |
| mouse Spp1tv1-2 Fwd | CCTGGCTGAATTCTGAGGGACTAA  |
| mouse Spp1tv1-2 Rev | CAATGCCAAACAGGCAAAAGCA    |
| mouse Spp1tv3-4 Fwd | CAGCCAAGGACTAACTACGACC    |
| mouse Spp1tv3-4 Rev | TTCTGTGGCGCAAGGAGATTC     |
| mouse Spp1tv5 Fwd   | ACTTGGTGGTGATCTAGTGGTG    |
| mouse Spp1tv5 Rev   | ACTGCCAATCTCATGGTCGTA     |
| human AIF1 Fwd      | CGAATGCTGGAGAACTTGGA      |
| human AIF1 Rev      | GAAAGTCAGGGTAGCTGAACG     |
| human GFAP Fwd      | CGCACGCAGTATGAGGCAA       |
| human GFAP Rev      | GACTCCAGGTCGCAGGTCAA      |

Suppl. Table S3

|             |           |        |                   |
|-------------|-----------|--------|-------------------|
| AQP4        | A5971     | 1:150  | Sigma             |
| CD31        | DIA-310   | 1:100  | Histobiotech      |
| GFAP        | Z0334     | 1:8000 | Dako              |
| GRASP65     | PA3-910   | 1:100  | Thermo Scientific |
| Iba1        | ab124800  | 1:200  | abcam             |
| Iba1        | 019-19741 | 1:500  | Wako              |
| Ki67        | VP-RM04   | 1:200  | Vector            |
| PDGFRbeta   | 3169      | 1:300  | Cell Signaling    |
| human OPN   | AF1433    | 1:2000 | R&D Systems       |
| mouse OPN   | AF808     | 1:1000 | R&D Systems       |
| human LAMP1 | 9091      | 1:200  | Cell Signaling    |
| mouse LAMP1 | MAB4320   | 1:100  | R&D Systems       |

# Suppl. Figure S1

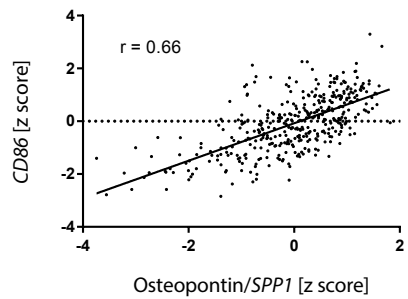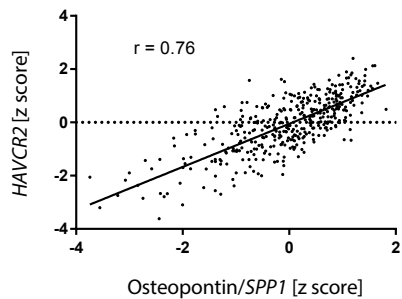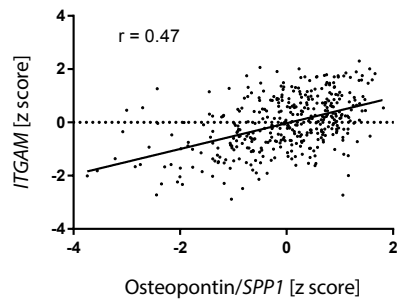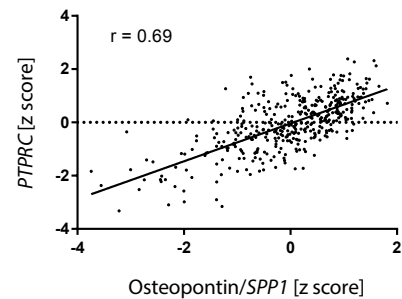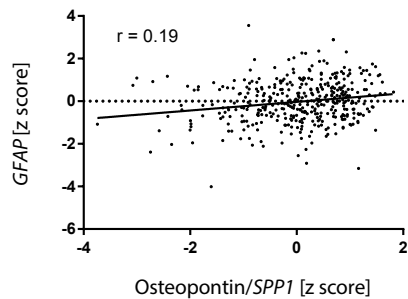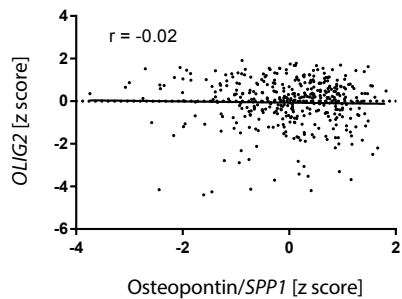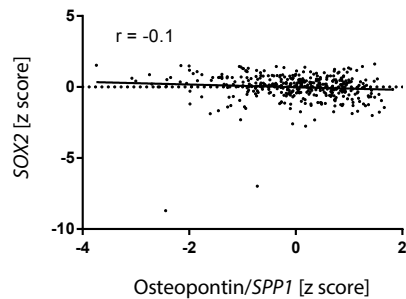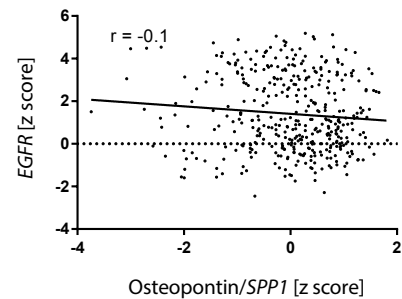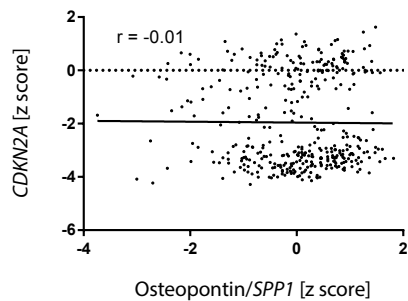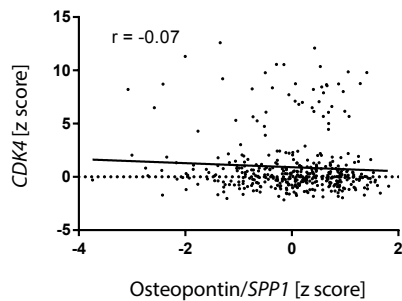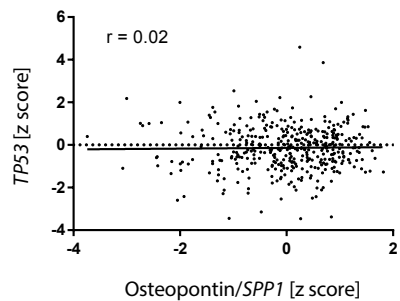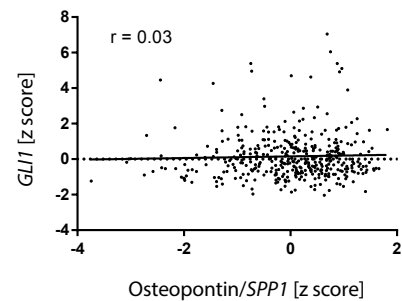

# Suppl. Figure S2

**A** Expression of human *SPP1*/Osteopontin transcript variants (tv)

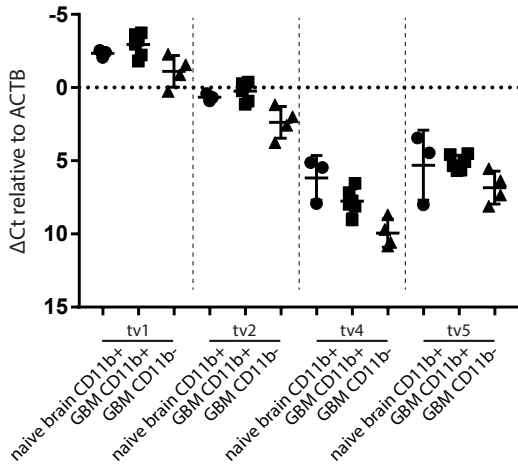

**B** Expression of human *SPP1*/Osteopontin transcript variants (tv)

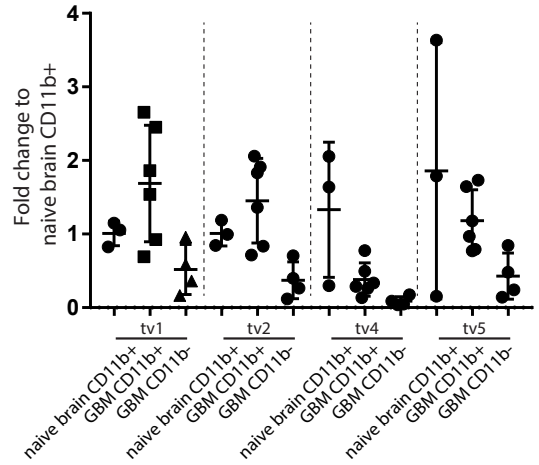

**C** ANOVA multiple comparison statistics for  $\Delta C_t$  values (Graph A)

| Tukey's multiple comparisons test                    | Mean Diff.    | 95.00% CI of diff.      | Adjusted P Value  |
|------------------------------------------------------|---------------|-------------------------|-------------------|
| naive brain CD11b+ tv1 vs. GBM CD11b+ tv1            | 0.596         | -1.86 to 3.052          | 0.9993            |
| naive brain CD11b+ tv1 vs. GBM CD11b- tv1            | -1.227        | -3.881 to 1.426         | 0.8975            |
| <b>naive brain CD11b+ tv1 vs. naive brain CD11b+</b> | <b>-3.003</b> | <b>-5.84 to -0.1669</b> | <b>0.0298</b>     |
| <b>naive brain CD11b+ tv1 vs. naive brain CD11b+</b> | <b>-8.51</b>  | <b>-11.35 to -5.674</b> | <b>&lt;0.0001</b> |
| <b>naive brain CD11b+ tv1 vs. naive brain CD11b+</b> | <b>-7.64</b>  | <b>-10.48 to -4.804</b> | <b>&lt;0.0001</b> |
| GBM CD11b+ tv1 vs. GBM CD11b- tv1                    | -1.823        | -4.066 to 0.419         | 0.2104            |
| <b>GBM CD11b+ tv1 vs. GBM CD11b+ tv2</b>             | <b>-3.175</b> | <b>-5.18 to -1.169</b>  | <b>0.0001</b>     |
| <b>GBM CD11b+ tv1 vs. GBM CD11b+ tv4</b>             | <b>-10.7</b>  | <b>-12.71 to -8.695</b> | <b>&lt;0.0001</b> |
| <b>GBM CD11b+ tv1 vs. GBM CD11b+ tv5</b>             | <b>-8.07</b>  | <b>-10.08 to -6.065</b> | <b>&lt;0.0001</b> |
| <b>GBM CD11b- tv1 vs. GBM CD11b- tv2</b>             | <b>-3.486</b> | <b>-5.942 to -1.03</b>  | <b>0.0008</b>     |
| <b>GBM CD11b- tv1 vs. GBM CD11b- tv4</b>             | <b>-11.06</b> | <b>-13.51 to -8.602</b> | <b>&lt;0.0001</b> |
| <b>GBM CD11b- tv1 vs. GBM CD11b- tv5</b>             | <b>-7.951</b> | <b>-10.41 to -5.495</b> | <b>&lt;0.0001</b> |
| naive brain CD11b+ tv2 vs. GBM CD11b+ tv2            | 0.4248        | -2.032 to 2.881         | >0.9999           |
| naive brain CD11b+ tv2 vs. GBM CD11b- tv2            | -1.71         | -4.363 to 0.9432        | 0.5358            |
| <b>naive brain CD11b+ tv2 vs. naive brain CD11b+</b> | <b>-5.507</b> | <b>-8.343 to -2.67</b>  | <b>&lt;0.0001</b> |
| <b>naive brain CD11b+ tv2 vs. naive brain CD11b+</b> | <b>-4.637</b> | <b>-7.473 to -1.8</b>   | <b>&lt;0.0001</b> |
| GBM CD11b+ tv2 vs. GBM CD11b- tv2                    | -2.135        | -4.377 to 0.1075        | 0.0747            |
| <b>GBM CD11b+ tv2 vs. GBM CD11b+ tv4</b>             | <b>-7.527</b> | <b>-9.532 to -5.521</b> | <b>&lt;0.0001</b> |
| <b>GBM CD11b+ tv2 vs. GBM CD11b+ tv5</b>             | <b>-4.896</b> | <b>-6.901 to -2.89</b>  | <b>&lt;0.0001</b> |
| <b>GBM CD11b- tv2 vs. GBM CD11b- tv4</b>             | <b>-7.572</b> | <b>-10.03 to -5.116</b> | <b>&lt;0.0001</b> |
| <b>GBM CD11b- tv2 vs. GBM CD11b- tv5</b>             | <b>-4.465</b> | <b>-6.921 to -2.009</b> | <b>&lt;0.0001</b> |
| naive brain CD11b+ tv4 vs. GBM CD11b+ tv4            | -1.595        | -4.051 to 0.8614        | 0.5248            |
| <b>naive brain CD11b+ tv4 vs. GBM CD11b- tv4</b>     | <b>-3.776</b> | <b>-6.429 to -1.122</b> | <b>0.0008</b>     |
| naive brain CD11b+ tv4 vs. naive brain CD11b+ tv5    | 0.87          | -1.966 to 3.706         | 0.9947            |
| GBM CD11b+ tv4 vs. GBM CD11b- tv4                    | -2.181        | -4.423 to 0.06173       | 0.0631            |
| <b>GBM CD11b+ tv4 vs. GBM CD11b+ tv5</b>             | <b>2.631</b>  | <b>0.625 to 4.636</b>   | <b>0.0026</b>     |
| <b>GBM CD11b- tv4 vs. GBM CD11b- tv5</b>             | <b>3.107</b>  | <b>0.6508 to 5.564</b>  | <b>0.0041</b>     |
| naive brain CD11b+ tv5 vs. GBM CD11b+ tv5            | 0.1657        | -2.291 to 2.622         | >0.9999           |
| naive brain CD11b+ tv5 vs. GBM CD11b- tv5            | -1.538        | -4.192 to 1.115         | 0.6839            |
| GBM CD11b+ tv5 vs. GBM CD11b- tv5                    | -1.704        | -3.946 to 0.5383        | 0.295             |

**D** ANOVA multiple comparison statistics for Fold change values (Graph B)

| Tukey's multiple comparisons test                 | Mean Diff.   | 95.00% CI of diff.      | Adjusted P Value |
|---------------------------------------------------|--------------|-------------------------|------------------|
| naive brain CD11b+ tv1 vs. GBM CD11b+ tv1         | -0.6774      | -2.161 to 0.8065        | 0.9052           |
| naive brain CD11b+ tv1 vs. GBM CD11b- tv1         | 0.4927       | -1.11 to 2.095          | 0.9946           |
| naive brain CD11b+ tv1 vs. naive brain CD11b+ tv2 | -8.3E-05     | -1.714 to 1.713         | >0.9999          |
| naive brain CD11b+ tv1 vs. naive brain CD11b+ tv4 | -0.3208      | -2.034 to 1.393         | >0.9999          |
| naive brain CD11b+ tv1 vs. naive brain CD11b+ tv5 | -0.8497      | -2.563 to 0.8638        | 0.8487           |
| GBM CD11b+ tv1 vs. GBM CD11b- tv1                 | 1.17         | -0.1845 to 2.525        | 0.1477           |
| GBM CD11b+ tv1 vs. GBM CD11b+ tv2                 | 0.2349       | -0.9767 to 1.446        | >0.9999          |
| <b>GBM CD11b+ tv1 vs. GBM CD11b+ tv4</b>          | <b>1.305</b> | <b>0.09362 to 2.517</b> | <b>0.0252</b>    |
| GBM CD11b+ tv1 vs. GBM CD11b+ tv5                 | 0.5058       | -0.7058 to 1.717        | 0.9459           |
| GBM CD11b- tv1 vs. GBM CD11b- tv2                 | 0.1453       | -1.339 to 1.629         | >0.9999          |
| GBM CD11b- tv1 vs. GBM CD11b- tv4                 | 0.4299       | -1.054 to 1.914         | 0.9967           |
| GBM CD11b- tv1 vs. GBM CD11b- tv5                 | 0.08903      | -1.395 to 1.573         | >0.9999          |
| naive brain CD11b+ tv2 vs. GBM CD11b+ tv2         | -0.4425      | -1.926 to 1.041         | 0.9958           |
| naive brain CD11b+ tv2 vs. GBM CD11b- tv2         | 0.638        | -0.9648 to 2.241        | 0.9608           |
| naive brain CD11b+ tv2 vs. naive brain CD11b+ tv4 | -0.3207      | -2.034 to 1.393         | >0.9999          |
| naive brain CD11b+ tv2 vs. naive brain CD11b+ tv5 | -0.8496      | -2.563 to 0.8639        | 0.8488           |
| GBM CD11b+ tv2 vs. GBM CD11b- tv2                 | 1.081        | -0.2741 to 2.435        | 0.2331           |
| GBM CD11b+ tv2 vs. GBM CD11b+ tv4                 | 1.07         | -0.1413 to 2.282        | 0.1278           |
| GBM CD11b+ tv2 vs. GBM CD11b+ tv5                 | 0.271        | -0.9406 to 1.483        | 0.9997           |
| GBM CD11b- tv2 vs. GBM CD11b- tv4                 | 0.2846       | -1.199 to 1.768         | >0.9999          |
| GBM CD11b- tv2 vs. GBM CD11b- tv5                 | -0.05628     | -1.54 to 1.428          | >0.9999          |
| naive brain CD11b+ tv4 vs. GBM CD11b+ tv4         | 0.9485       | -0.5354 to 2.432        | 0.548            |
| naive brain CD11b+ tv4 vs. GBM CD11b- tv4         | 1.243        | -0.3595 to 2.846        | 0.268            |
| naive brain CD11b+ tv4 vs. naive brain CD11b+ tv5 | -0.5289      | -2.242 to 1.185         | 0.9944           |
| GBM CD11b+ tv4 vs. GBM CD11b- tv4                 | 0.2947       | -1.06 to 1.649          | 0.9998           |
| GBM CD11b+ tv4 vs. GBM CD11b+ tv5                 | -0.7994      | -2.011 to 0.4122        | 0.5009           |
| GBM CD11b- tv4 vs. GBM CD11b- tv5                 | -0.3408      | -1.825 to 1.143         | 0.9996           |
| naive brain CD11b+ tv5 vs. GBM CD11b+ tv5         | 0.678        | -0.8059 to 2.162        | 0.9047           |
| naive brain CD11b+ tv5 vs. GBM CD11b- tv5         | 1.431        | -0.1715 to 3.034        | 0.1189           |
| GBM CD11b+ tv5 vs. GBM CD11b- tv5                 | 0.7533       | -0.6013 to 2.108        | 0.7353           |

**E** Expression of *AIF1*/Iba1 in human GBM fractions

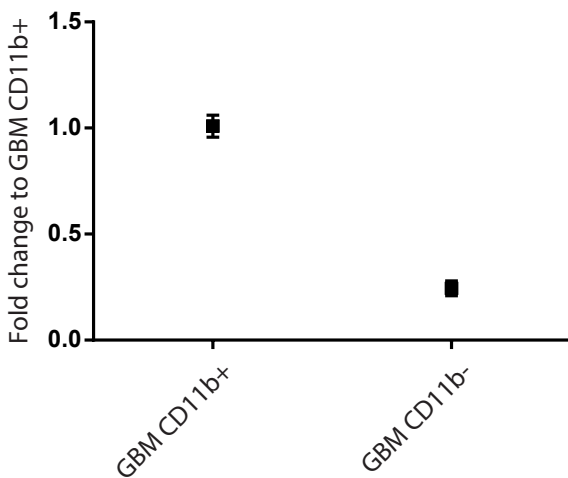

**F** Expression of *GFAP* in human GBM fractions

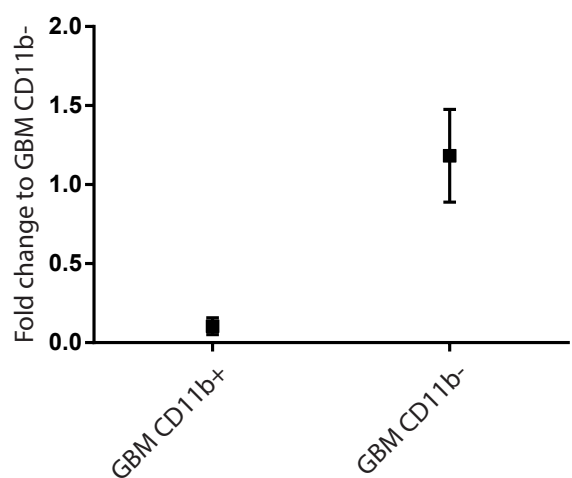



Suppl. Figure S3

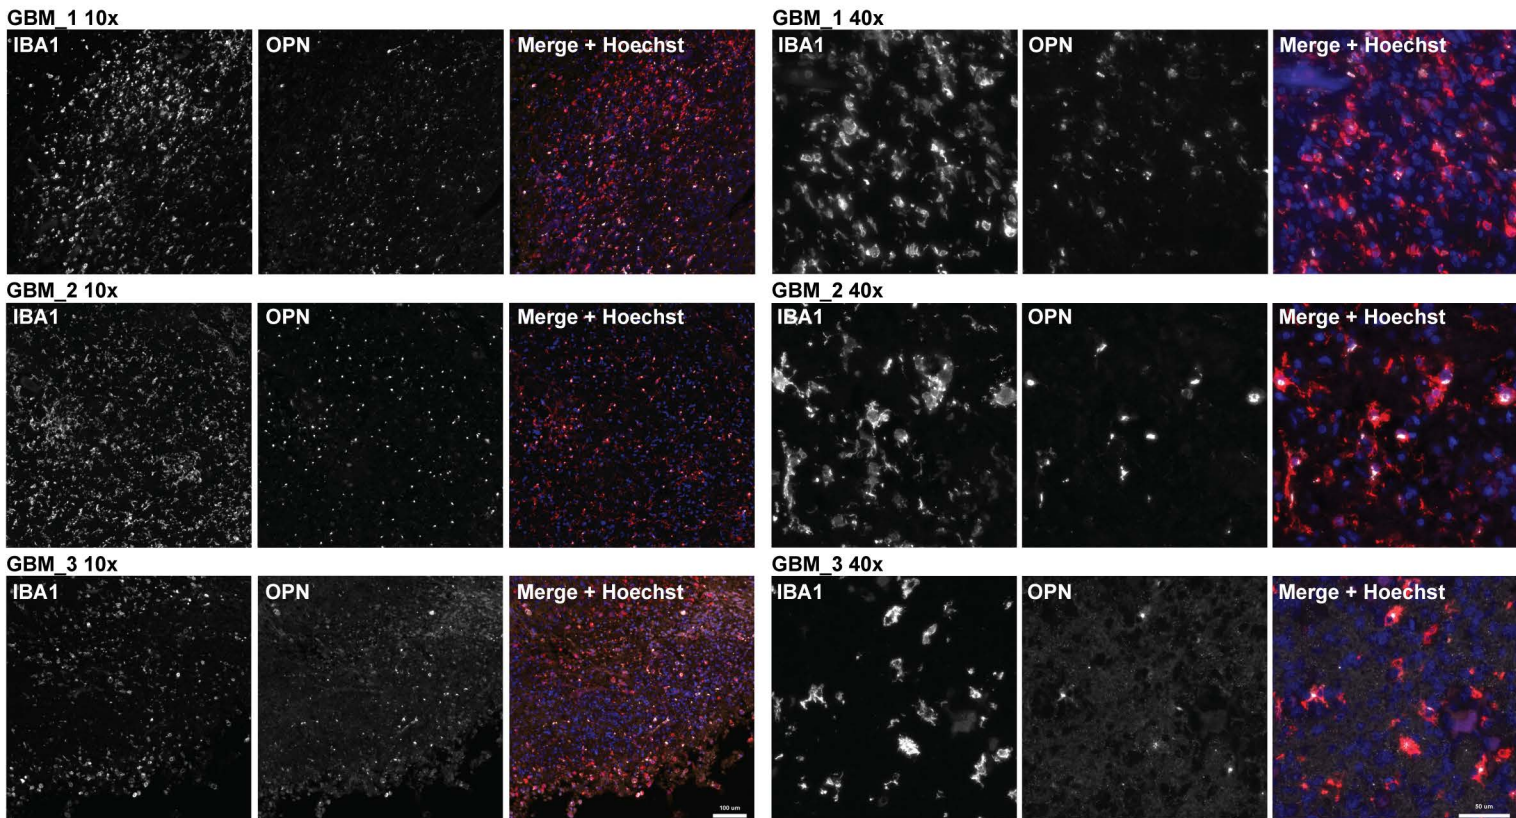

Area 1

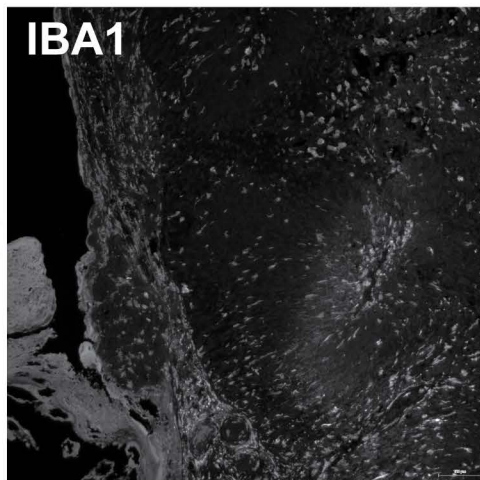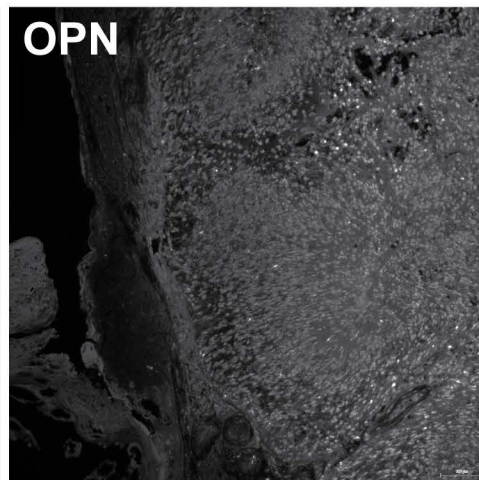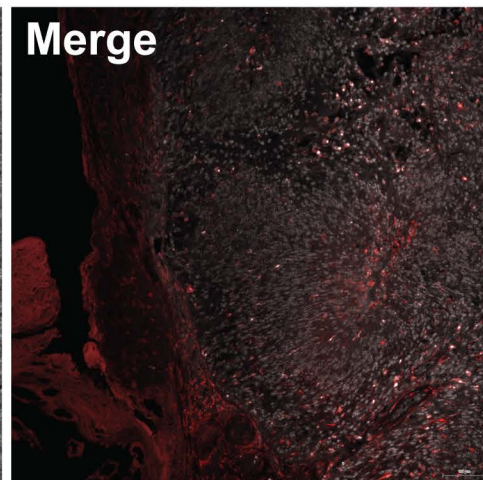

Area 2

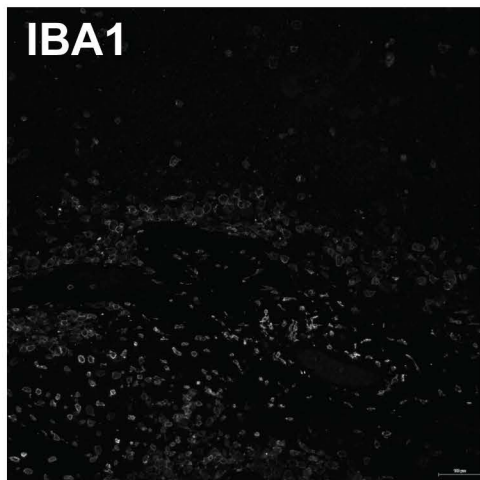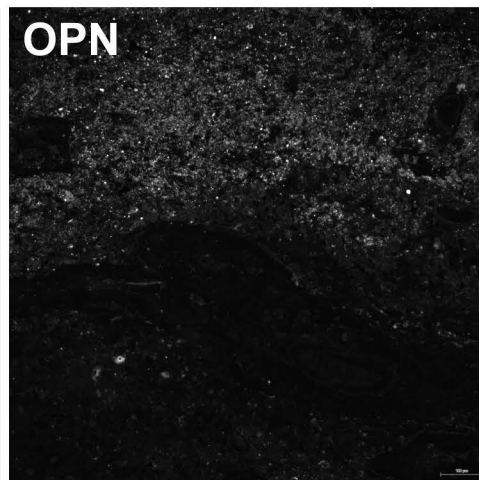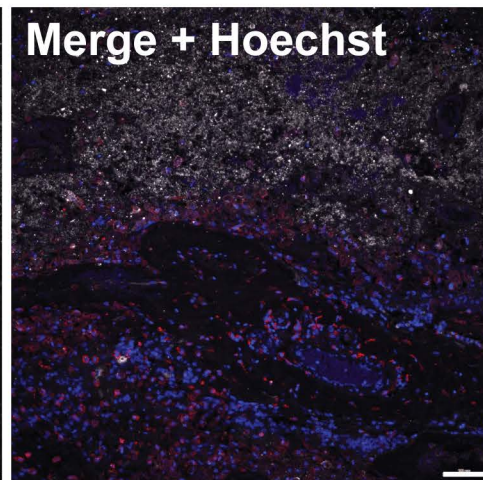

**A** Osteopontin/*Spp1*-expressing cells in naive brain and GL261 tumors by flow cytometry

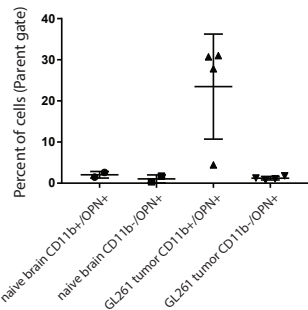

**B** ANOVA multiple comparison statistics for Graph A

| Tukey's multiple comparisons test       | Mean Diff. | 95.00% CI of diff. | Adjusted P Value |
|-----------------------------------------|------------|--------------------|------------------|
| CTR CD11b+ OPN+ vs. CTR CD11b- OPN+     | 1.015      | -24.09 to 26.12    | 0.9992           |
| CTR CD11b+ OPN+ vs. Tumor CD11b+ OPN+   | -21.44     | -43.18 to 0.3029   | 0.0532           |
| CTR CD11b+ OPN+ vs. Tumor CD11b- OPN+   | 0.84       | -20.9 to 22.58     | 0.9993           |
| CTR CD11b- OPN+ vs. Tumor CD11b+ OPN+   | -22.45     | -44.19 to -0.7121  | 0.0432           |
| CTR CD11b- OPN+ vs. Tumor CD11b- OPN+   | -0.175     | -21.92 to 21.57    | >0.9999          |
| Tumor CD11b+ OPN+ vs. Tumor CD11b- OPN+ | 22.28      | 4.527 to 40.03     | 0.0162           |

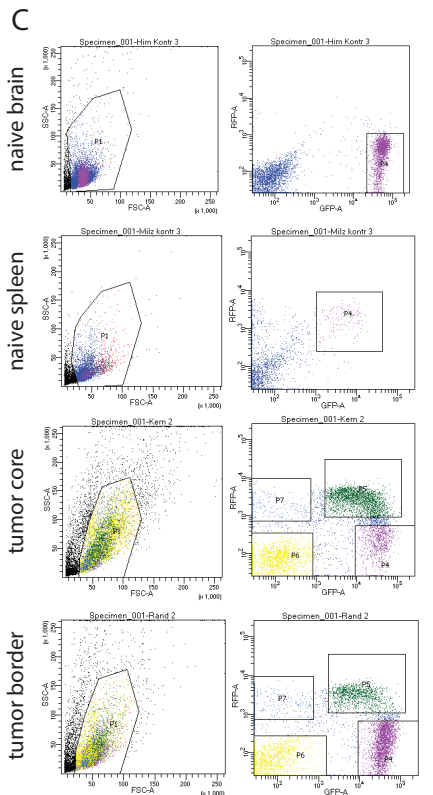

**D** Immune cell populations in GL261 tumors

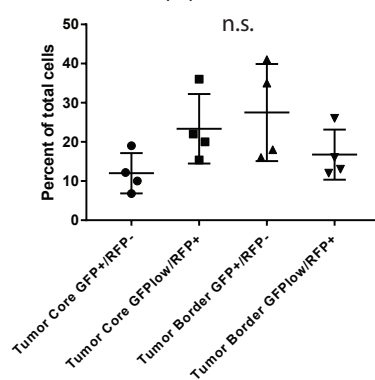

**E** Expression of mouse *Spp1*/Osteopontin transcript variants (tv)

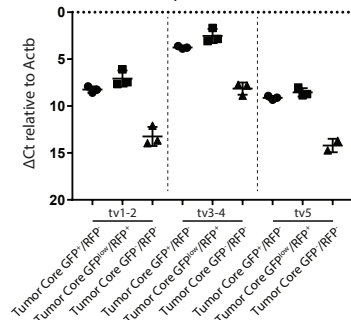

**F** ANOVA multiple comparison statistics for  $\Delta C_t$  values mouse SPP1/Osteopontin transcript variants

| Tukey's multiple comparisons test                                    | Mean Diff.    | 95.00% CI of diff.      | Adjusted P Value  |
|----------------------------------------------------------------------|---------------|-------------------------|-------------------|
| Tumor Core GFP+/RFP- tv1-2 vs. Tumor Core GFPloW/RFP+ tv1-2          | 1.173         | -0.6418 to 2.988        | 0.4027            |
| <b>Tumor Core GFP+/RFP- tv1-2 vs. Tumor Core GFP-/RFP- tv1-2</b>     | <b>-4.997</b> | <b>-6.812 to -3.182</b> | <b>&lt;0.0001</b> |
| <b>Tumor Core GFP+/RFP- tv1-2 vs. Tumor Core GFP+/RFP- tv3-4</b>     | <b>4.49</b>   | <b>2.675 to 6.305</b>   | <b>&lt;0.0001</b> |
| Tumor Core GFP+/RFP- tv1-2 vs. Tumor Core GFP+/RFP- tv5              | -0.877        | -2.692 to 0.9381        | 0.7362            |
| <b>Tumor Core GFPloW/RFP+ tv1-2 vs. Tumor Core GFP-/RFP- tv1-2</b>   | <b>-6.17</b>  | <b>-7.985 to -4.355</b> | <b>&lt;0.0001</b> |
| <b>Tumor Core GFPloW/RFP+ tv1-2 vs. Tumor Core GFPloW/RFP+ tv3-4</b> | <b>4.532</b>  | <b>2.723 to 6.353</b>   | <b>&lt;0.0001</b> |
| Tumor Core GFPloW/RFP+ tv1-2 vs. Tumor Core GFPloW/RFP+ tv5          | -1.467        | -3.282 to 0.3478        | 0.1699            |
| <b>Tumor Core GFP-/RFP- tv1-2 vs. Tumor Core GFP-/RFP- tv3-4</b>     | <b>5.099</b>  | <b>3.284 to 6.914</b>   | <b>&lt;0.0001</b> |
| Tumor Core GFP-/RFP- tv1-2 vs. Tumor Core GFP-/RFP- tv5              | -0.9953       | -2.999 to 1.00          | 0.747             |
| Tumor Core GFP+/RFP- tv3-4 vs. Tumor Core GFPloW/RFP+ tv3-4          | 1.221         | -0.5941 to 3.036        | 0.3555            |
| <b>Tumor Core GFP+/RFP- tv3-4 vs. Tumor Core GFP-/RFP- tv3-4</b>     | <b>-4.388</b> | <b>-6.203 to -2.573</b> | <b>&lt;0.0001</b> |
| <b>Tumor Core GFP+/RFP- tv3-4 vs. Tumor Core GFP+/RFP- tv5</b>       | <b>-5.367</b> | <b>-7.182 to -3.552</b> | <b>&lt;0.0001</b> |
| <b>Tumor Core GFPloW/RFP+ tv3-4 vs. Tumor Core GFP-/RFP- tv3-4</b>   | <b>-6.609</b> | <b>-7.424 to -3.794</b> | <b>&lt;0.0001</b> |
| <b>Tumor Core GFPloW/RFP+ tv3-4 vs. Tumor Core GFPloW/RFP+ tv5</b>   | <b>-6.005</b> | <b>-7.82 to -4.19</b>   | <b>&lt;0.0001</b> |
| <b>Tumor Core GFP-/RFP- tv3-4 vs. Tumor Core GFP-/RFP- tv5</b>       | <b>-6.069</b> | <b>-8.095 to -4.039</b> | <b>&lt;0.0001</b> |
| Tumor Core GFP+/RFP- tv5 vs. Tumor Core GFPloW/RFP+ tv5              | 0.553         | -1.232 to 2.398         | 0.9602            |
| <b>Tumor Core GFP+/RFP- tv5 vs. Tumor Core GFP-/RFP- tv5</b>         | <b>-5.089</b> | <b>-7.118 to -3.06</b>  | <b>&lt;0.0001</b> |
| <b>Tumor Core GFPloW/RFP+ tv5 vs. Tumor Core GFP-/RFP- tv5</b>       | <b>-5.672</b> | <b>-7.701 to -3.643</b> | <b>&lt;0.0001</b> |



# Suppl. Figure S6

**A**

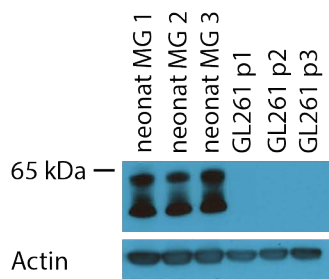

**B**

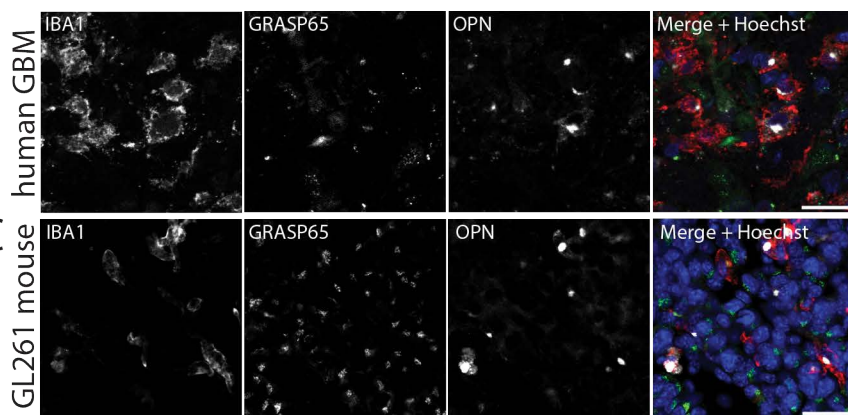

**C**

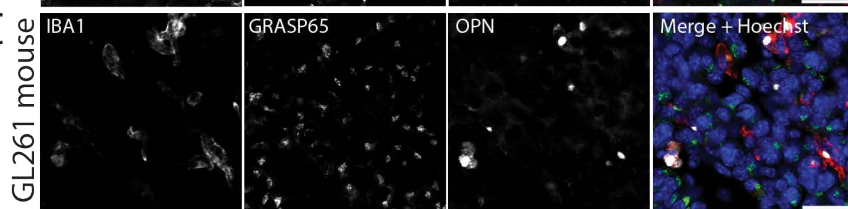

**D**

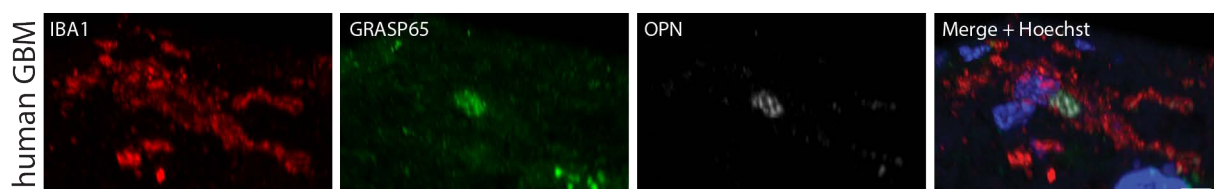

**E**

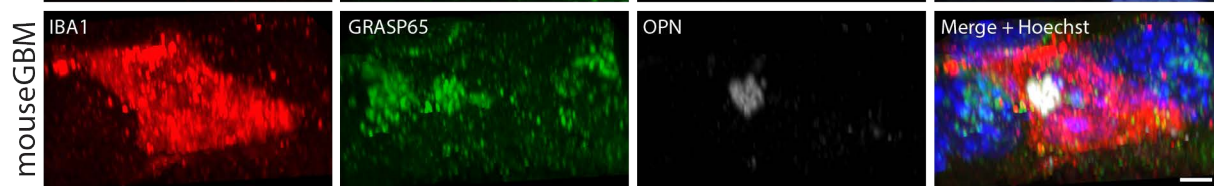

**F**

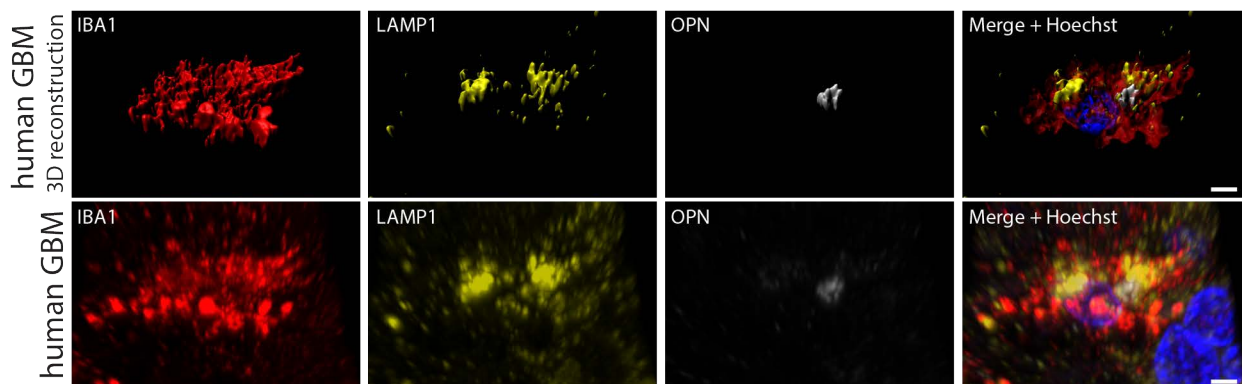

**G**

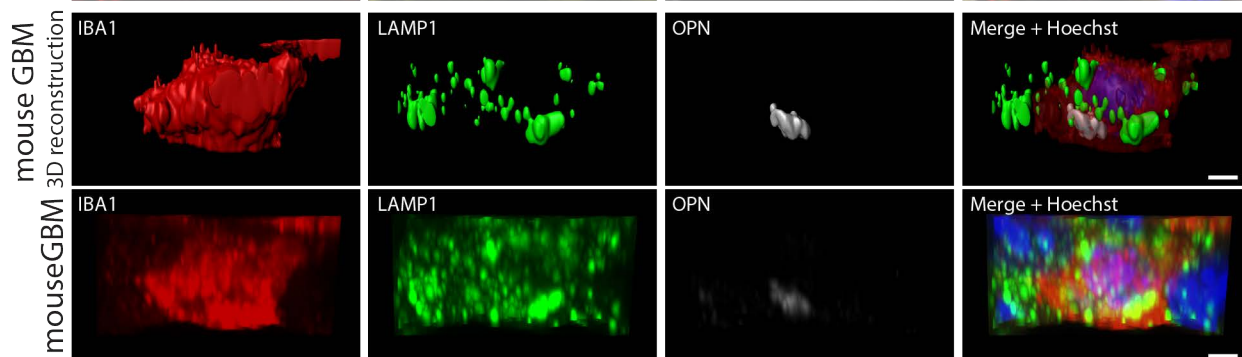

# Suppl. Figure S7

## Weight progression

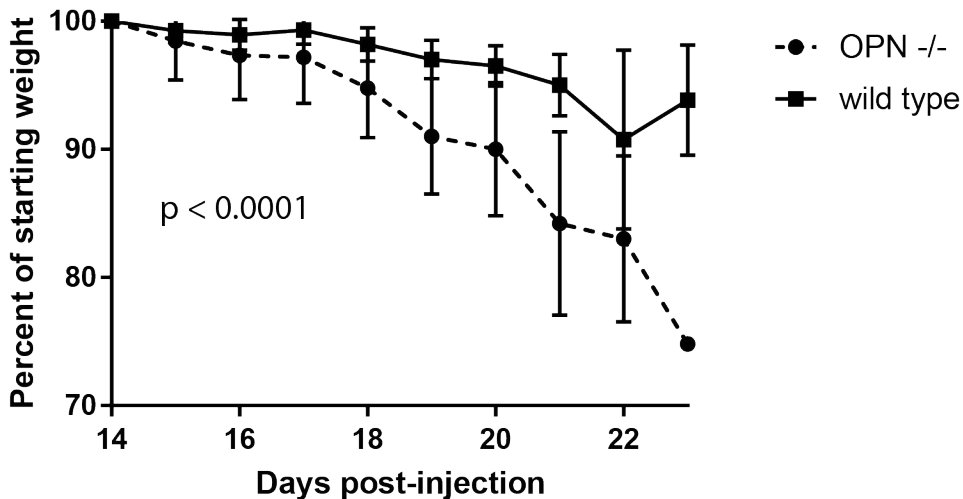

# Suppl. Figure S8

## A

GL261 tumor in wild type mouse

GL261 tumor in OPN<sup>-/-</sup> mouse

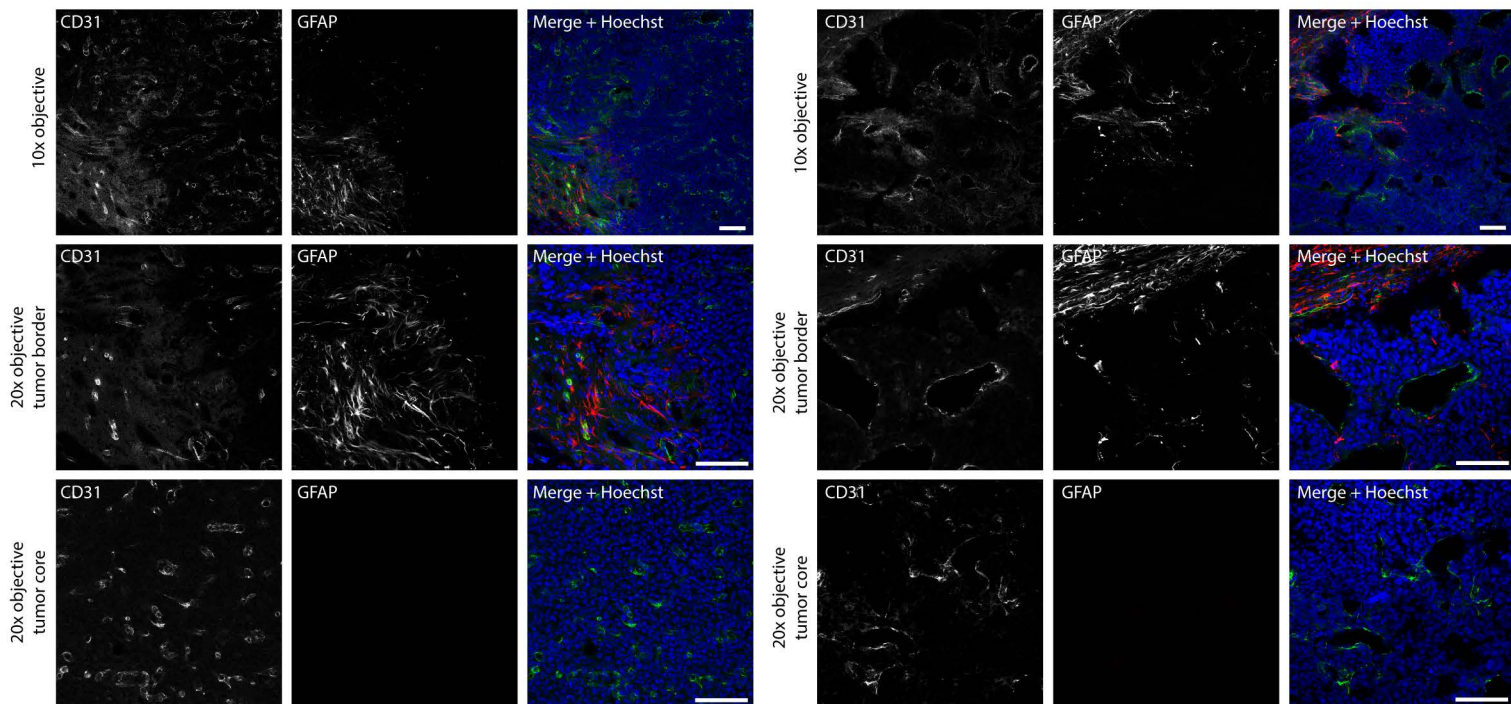

## B

GL261 tumor in wild type mouse

GL261 tumor in OPN<sup>-/-</sup> mouse

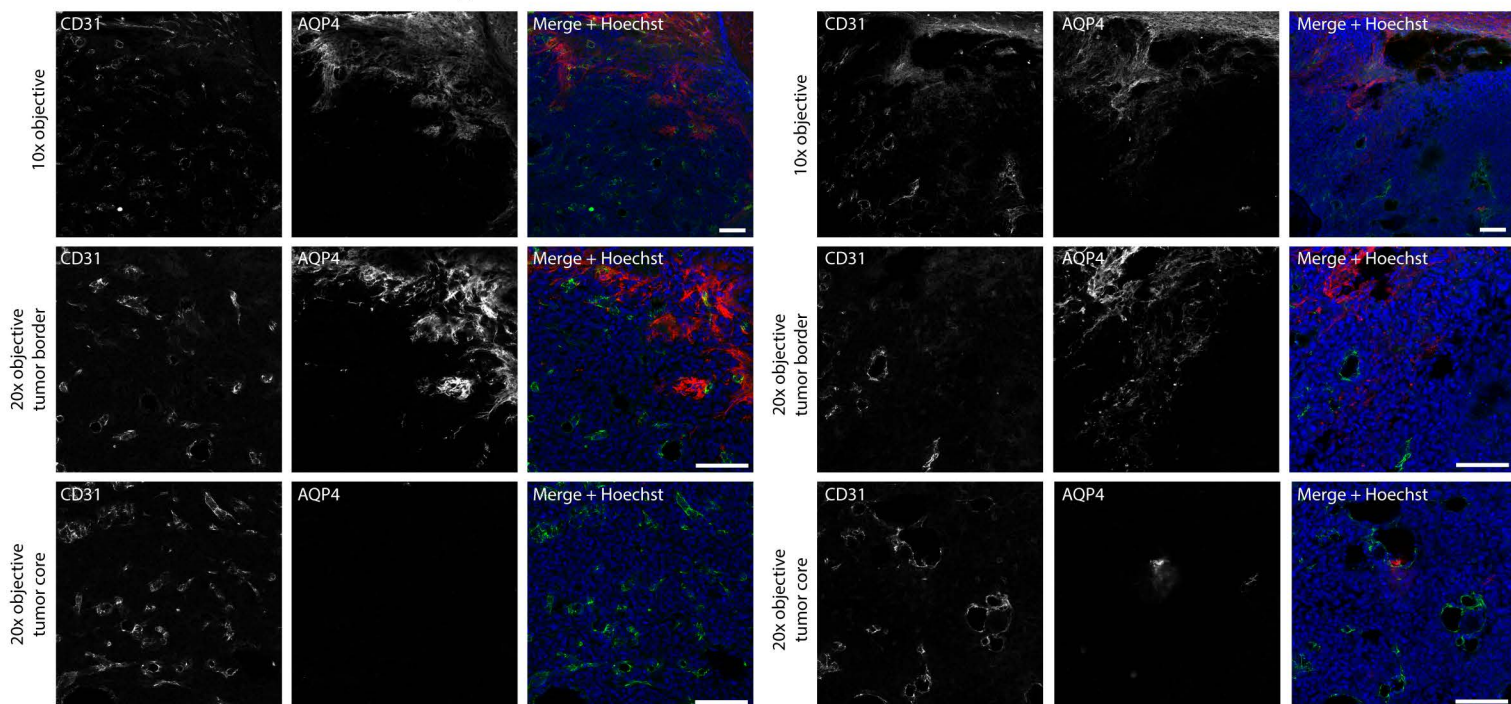



# Suppl. Figure S9

wild type naive brain

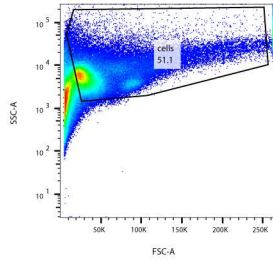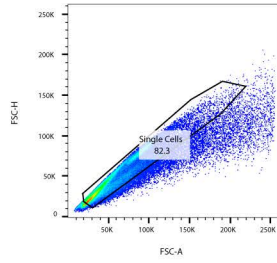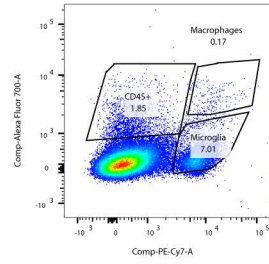

OPN<sup>-/-</sup> naive brain

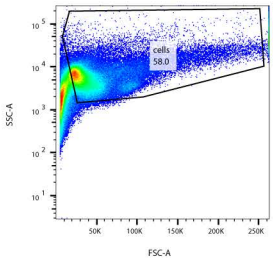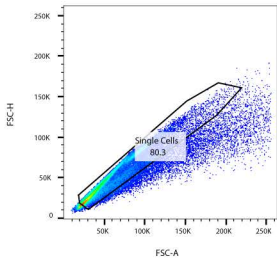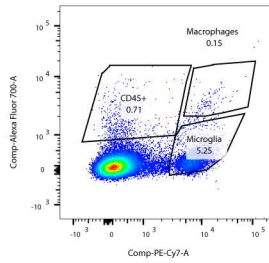

wild type GL261 tumor

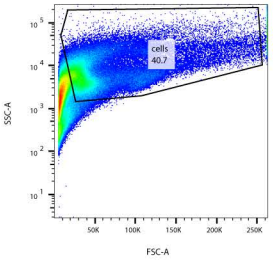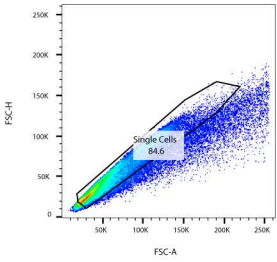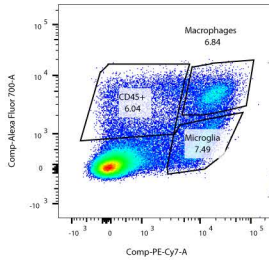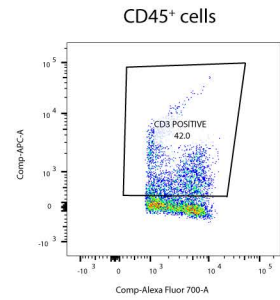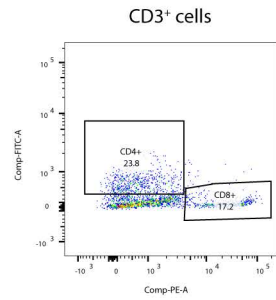

OPN<sup>-/-</sup> GL261 tumor

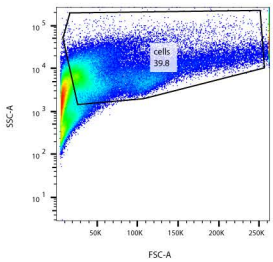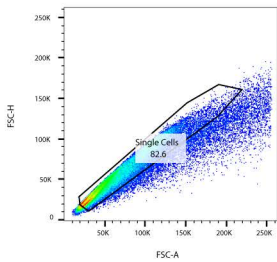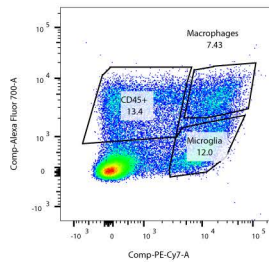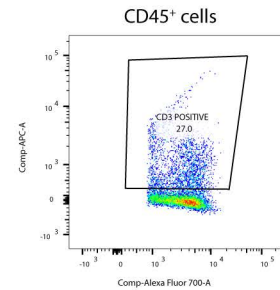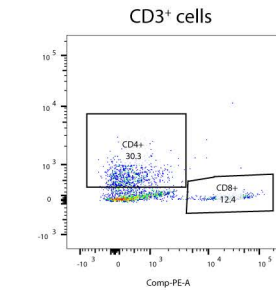

Supplement: nox165_suppl_suppl_data.pdf [file nox165_suppl_suppl_data.pdf]
